# Supplementary material for: Colorimetric and fluorescent dual-mode detection of microRNA based on duplex-specific nuclease assisted gold nanoparticle amplification
Source: Royal Society of Chemistry journal article supplement (doi:10.1039/c9an01013k), 2019-01-01
Supplement: c9an01013k1.pdf [file c9an01013k1.pdf]

## Electronic Supplementary Information (ESI)

### Colorimetric and Fluorescent Dual-mode Detection of MicroRNA

### Based on Duplex-Specific Nuclease Assisted Gold Nanoparticle

### Amplification

*Jin Huang,<sup>a</sup> Jingfang Shangguan,<sup>b</sup> Qiuping Guo,<sup>a</sup> Wenjie Ma,<sup>a</sup> Huizhen Wang,<sup>a</sup>*

*Ruichen Jia,<sup>a</sup> Zi Ye,<sup>c</sup> Xiaoxiao He<sup>\*a</sup> and Kemin Wang<sup>\*a</sup>*

<sup>a</sup> State Key Laboratory of Chemo/Biosensing and Chemometrics, College of Biology, College of Chemistry and Chemical Engineering, Hunan University, Key Laboratory for Bio-Nanotechnology and Molecular Engineering of Hunan Province, Changsha 410082, China.

<sup>b</sup> School of Pharmacy, Xinxiang Medical University, Xinxiang, Henan 453003, P. R. China.

<sup>c</sup> High School of Yali, Changsha, Hunan, 410007, China.

\*Corresponding author. Tel: (+86)-731-8882-3073. E-mail addresses: [xiaoxiaohe@hnu.edu.cn](mailto:xiaoxiaohe@hnu.edu.cn); [kmwang@hnu.edu.cn](mailto:kmwang@hnu.edu.cn).

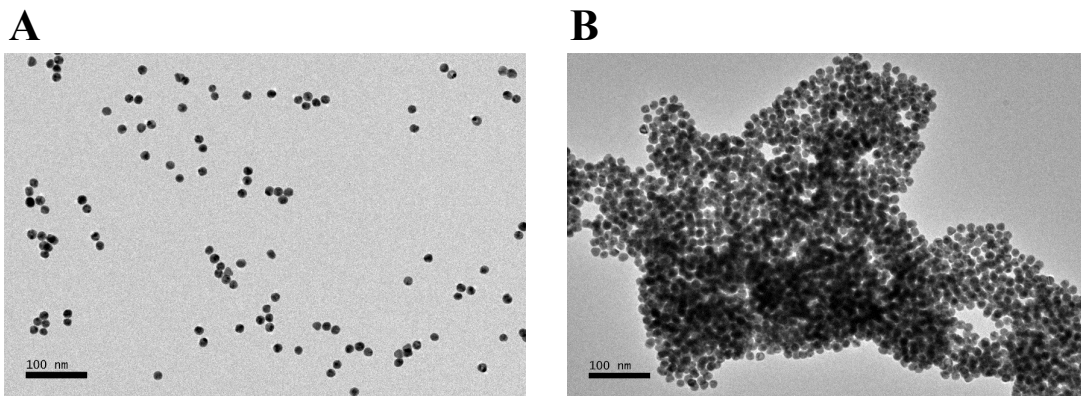

**Fig. S1.** TEM images of  $13 \pm 2$  nm bare AuNPs (A) and aggregated hairpin probes (HPs)-modified AuNPs triggered by miR-21 (B).

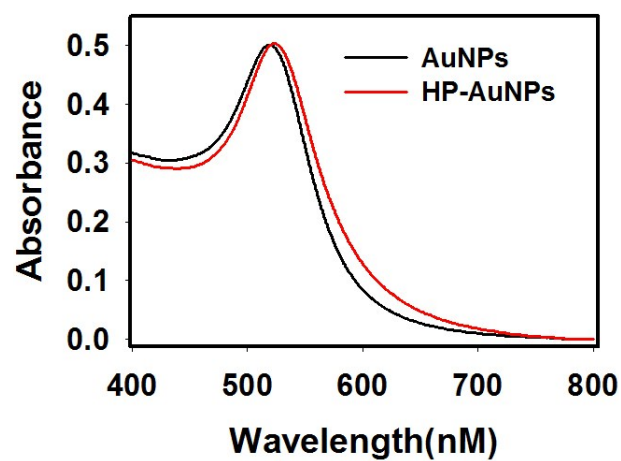

**Fig S2.** UV-vis spectra of AuNPs (black line) and hairpin probe-modified AuNPs (HP-AuNPs, red line). The maximum optical absorption was shifted from 518 nm to 524 nm after modification.

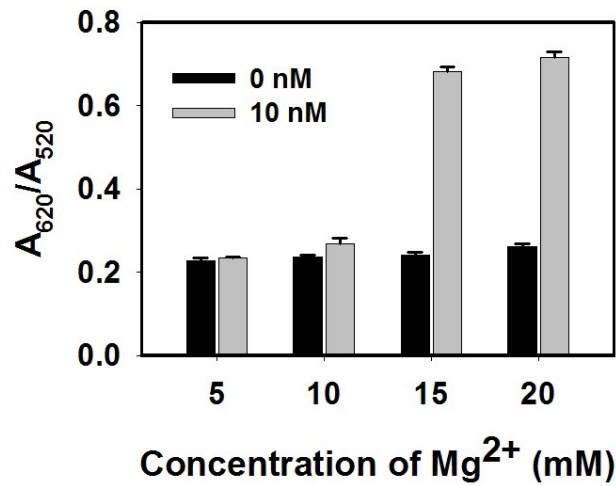

**Fig S3.** Optimization of Mg<sup>2+</sup> concentrations in 1 × DSN master buffer (50 mM Tris-HCl, pH 8.0, 1 mM DTT) with variable concentrations (5, 10, 15, 20 mM) of MgCl<sub>2</sub> at 37 °C for 2 h. The concentration of the HPs and DSN enzyme were fixed at 80 nM and 0.2 U. Bars represent the signal response of miR-21 at 0 nM (black bar) and 10 nM (gray bar), respectively. Error bars represent the standard deviations from three independent experiments.

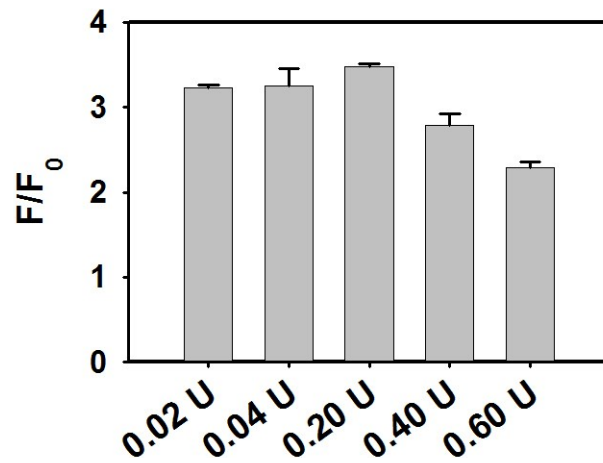

**Fig S4.** The variation in fluorescence signal ratio upon addition of different amounts of DSN enzyme (0.02, 0.04, 0.2, 0.4 and 0.6 U), where  $F_0$  and  $F$  are the fluorescence signals in the absence and presence of miR-21, respectively. The reaction was performed with 80 nM HPs, 10 nM target miR-21 and various amounts of DSN enzyme in  $1 \times$  DSN master buffer at 37 °C for 2 h.

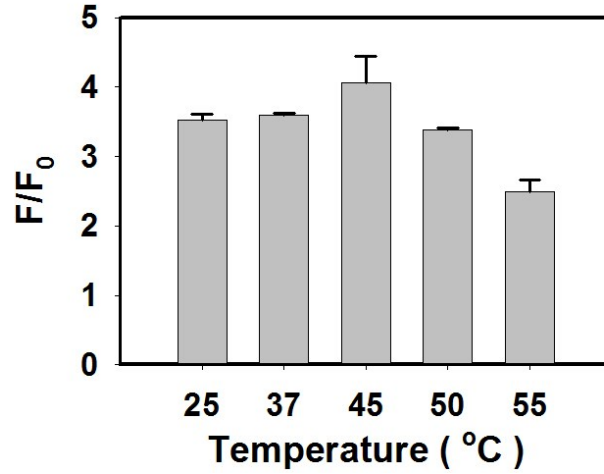

**Fig S5.** Optimization of reaction temperature. The performance of the assay was evaluated by the fluorescence signal ratio ( $F/F_0$ ) at different reaction temperatures (25, 37, 45, 50 and 55 °C), where  $F_0$  and  $F$  are the fluorescence signals in the absence and presence of miR-21. The concentration of the HPs, DSN enzyme and target miR-21 were fixed at 80 nM, 0.2 U and 10 nM, respectively.
